# Supplementary material for: Improving the evidence for indicator condition guided HIV testing in Europe: Results from the HIDES II Study – 2012 – 2015
Source: PubMed Central journal article supplement (PMC6692030; doi:10.1371/journal.pone.0220108), 2019-08-13
Supplement: pone.0220108.s003.pdf [file pone.0220108.s003.pdf]

# HIDES Enrolment

Patient ID:

---

((XXXX-XXXXX))

## Section A: Demography

Year of birth:

(MUST be between the age of 18 and 65)

---

((YYYY))

Gender:

- Male  
 Female

Ethnicity:

- Caucasian  
 Asian  
 African  
 Unknown

## Section B: Indicator Disease

Patient presenting with: (based on treating physician's clinical or microbiological diagnosis)

- Malignant lymphoma (irrespective of type)  
 Cervical dysplasia/cancer (CIN II and above)  
 Anal dysplasia/cancer  
 Hepatitis B (acute or chronic - and irrespective of time of diagnosis relative to time of survey)  
 Hepatitis C (acute or chronic - and irrespective of time of diagnosis relative to time of survey)  
 Hepatitis B+C (acute or chronic - and irrespective of time of diagnosis relative to time of survey)  
 Ongoing mononucleosis-like illness  
 Unexplained leukocytopenia or thrombocytopenia lasting at least 4 weeks  
 Seborrheic dermatitis/exanthema  
 Pneumonia (admitted to hospital at least 24h)  
 Unexplained lymphadenopathy  
 Peripheral neuropathy of unknown cause (diagnosed by neurologist)  
 Primary lung cancer  
 Severe or recalcitrant psoriasis (newly diagnosed)  
 Uveitis  
 Periodontitis  
 Acute coronary syndrome/myocardial infarction  
 Pulmonary hypertension  
 ((Only one box ticked allowed))

## Section C: HIV Test Results

Previous HIV serological status (patients must NOT be known to be HIV infected at the time of survey)

Previously tested for HIV:

- Yes  
 No  
 Unknown

---

Most recent previous negative HIV test:

\_\_\_\_\_  
((DD-MM-YYYY))

---

Total number of previous negative HIV tests:

\_\_\_\_\_

---

HIV test result:

- Positive  
 Negative

---

Date of blood sample:

\_\_\_\_\_  
((DD-MM-YYYY))

---

Patient received test result:

- Yes  
 No  
 Unknown

---

Patient successfully transferred to HIV specialist care:

- Yes  
 No  
 Unknown

---

### Section D: Setting

Setting patient was seen:

- Hospital out-patient department/clinic  
 Hospital in-patient/ward  
 Primary care

---

### Section E: HIV Infected

CD4 cell counts (closest to diagnosis) value:

\_\_\_\_\_

---

Date:

\_\_\_\_\_  
((DD-MM-YYYY))

---

HIV-RNA values:

\_\_\_\_\_  
((Units))

---

Date:

\_\_\_\_\_  
((DD-MM-YYYY))

---

### Section F: Additional Data Items

Sexual orientation:

- Heterosexual  
 Homosexual  
 Bisexual  
 Unknown

---

Active intravenous drug use:

- Yes  
 No  
 Unknown

Has the patient had any signs of less serious HIV related symptoms within the last 5 years:

- Mononucleosis-like illness
- Oral candidiasis
- Herpes zoster
- Unexplained leukocytopenia or thrombocytopenia
- Seborrheic dermatitis/exanthema
- None

Diagnosed sexually transmitted diseases within the last 5 years:

- Gonorrhoea
- Syphilis
- Other ulcerative genital conditions
- Chlamydia
- Unspecified
- None

### HBV

Any previous test of HBV:

- Yes
- No

Test result:

- Positive
- Negative

Date:

\_\_\_\_\_  
((DD-MM-YYYY))

### HCV

Any previous test of HCV:

- Yes
- No

Test result:

- Positive
- Negative

Date:

\_\_\_\_\_  
((DD-MM-YYYY))

### Hospitalization

Any hospitalization within the last 5 years:

- Yes
- No

### Due to severe opportunistic infections (including AIDS defining):

---

Diagnose:

- BCNE
- CANO
- CMVR
- CMVO
- CRCO
- CRSP
- CRVC
- FBLS
- HERP
- HIST
- ISDI
- KS
- LEIS
- LEU
- MC
- MCP
- MCX
- MCXO
- NHLB
- NHLI
- NHLU
- NHLP
- PCP
- SAM
- TOX

---

Please specify:

---

---

Date of diagnosis:

---

((DD-MM-YYYY))

---

---

Diagnose:

- BCNE
- CANO
- CMVR
- CMVO
- CRCO
- CRSP
- CRVC
- FBLS
- HERP
- HIST
- ISDI
- KS
- LEIS
- LEU
- MC
- MCP
- MCX
- MCXO
- NHLB
- NHLI
- NHLU
- NHLP
- PCP
- SAM
- TOX

---

Please specify:

---

---

Date of diagnosis:

\_\_\_\_\_  
((DD-MM-YYYY))

---

Diagnose:

- BCNE
- CANO
- CMVR
- CMVO
- CRCO
- CRSP
- CRVC
- FBLS
- HERP
- HIST
- ISDI
- KS
- LEIS
- LEU
- MC
- MCP
- MCX
- MCXO
- NHLB
- NHLI
- NHLU
- NHLP
- PCP
- SAM
- TOX

---

Please specify:

\_\_\_\_\_

---

Date of diagnosis:

\_\_\_\_\_  
((DD-MM-YYYY))

---

Diagnose:

- BCNE
- CANO
- CMVR
- CMVO
- CRCO
- CRSP
- CRVC
- FBLS
- HERP
- HIST
- ISDI
- KS
- LEIS
- LEU
- MC
- MCP
- MCX
- MCXO
- NHLB
- NHLI
- NHLU
- NHLP
- PCP
- SAM
- TOX

---

Please specify:

---

---

Date of diagnosis:

\_\_\_\_\_  
((DD-MM-YYYY))

---

Diagnose:

- BCNE
- CANO
- CMVR
- CMVO
- CRCO
- CRSP
- CRVC
- FBLS
- HERP
- HIST
- ISDI
- KS
- LEIS
- LEU
- MC
- MCP
- MCX
- MCXO
- NHLB
- NHLI
- NHLU
- NHLP
- PCP
- SAM
- TOX

---

Please specify:

---

---

Date of diagnosis:

\_\_\_\_\_  
((DD-MM-YYYY))

---

Diagnose:

- BCNE
- CANO
- CMVR
- CMVO
- CRCO
- CRSP
- CRVC
- FBLS
- HERP
- HIST
- ISDI
- KS
- LEIS
- LEU
- MC
- MCP
- MCX
- MCXO
- NHLB
- NHLI
- NHLU
- NHLP
- PCP
- SAM
- TOX

---

Please specify:

\_\_\_\_\_

---

Date of diagnosis:

\_\_\_\_\_  
((DD-MM-YYYY))

---

Diagnose:

- BCNE
- CANO
- CMVR
- CMVO
- CRCO
- CRSP
- CRVC
- FBLS
- HERP
- HIST
- ISDI
- KS
- LEIS
- LEU
- MC
- MCP
- MCX
- MCXO
- NHLB
- NHLI
- NHLU
- NHLP
- PCP
- SAM
- TOX

---

Please specify:

---

---

Date of diagnosis:

---

((DD-MM-YYYY))

---

---

Diagnose:

- BCNE
- CANO
- CMVR
- CMVO
- CRCO
- CRSP
- CRVC
- FBLS
- HERP
- HIST
- ISDI
- KS
- LEIS
- LEU
- MC
- MCP
- MCX
- MCXO
- NHLB
- NHLI
- NHLU
- NHLP
- PCP
- SAM
- TOX

---

Please specify:

---



---

Date of diagnosis:

\_\_\_\_\_  
((DD-MM-YYYY))

---

**Other severe infections/cancers:**

Diagnose:

- ALL
- AML
- ANUS
- BACT
- BLAD
- BRCA
- CERV
- CLL
- CML
- COLO
- COTC
- ENDO
- HDL
- KIDN
- LIVR
- LUNG
- LIPC
- MALM
- MEAC
- MENI
- MEOC
- MESC
- MULM
- PENC
- PERI
- PNEU
- PROS
- PYEL
- OSTI
- RECT
- STOM
- TESE
- UTER

---

Date of diagnosis:

\_\_\_\_\_  
((DD-MM-YYYY))

---

Diagnose:

- ALL
- AML
- ANUS
- BACT
- BLAD
- BRCA
- CERV
- CLL
- CML
- COLO
- COTC
- ENDO
- HDL
- KIDN
- LIVR
- LUNG
- LIPC
- MALM
- MEAC
- MENI
- MEOC
- MESC
- MULM
- PENC
- PERI
- PNEU
- PROS
- PYEL
- OSTI
- RECT
- STOM
- TESE
- UTER

---

Date of diagnosis:

\_\_\_\_\_  
((DD-MM-YYYY))

---

Diagnose:

- ALL
- AML
- ANUS
- BACT
- BLAD
- BRCA
- CERV
- CLL
- CML
- COLO
- COTC
- ENDO
- HDL
- KIDN
- LIVR
- LUNG
- LIPC
- MALM
- MEAC
- MENI
- MEOC
- MESC
- MULM
- PENC
- PERI
- PNEU
- PROS
- PYEL
- OSTI
- RECT
- STOM
- TESE
- UTER

---

Date of diagnosis:

\_\_\_\_\_  
((DD-MM-YYYY))

---

Diagnose:

- ALL
- AML
- ANUS
- BACT
- BLAD
- BRCA
- CERV
- CLL
- CML
- COLO
- COTC
- ENDO
- HDL
- KIDN
- LIVR
- LUNG
- LIPC
- MALM
- MEAC
- MENI
- MEOC
- MESC
- MULM
- PENC
- PERI
- PNEU
- PROS
- PYEL
- OSTI
- RECT
- STOM
- TESE
- UTER

---

Date of diagnosis:

\_\_\_\_\_  
((DD-MM-YYYY))

---

Diagnose:

- ALL
- AML
- ANUS
- BACT
- BLAD
- BRCA
- CERV
- CLL
- CML
- COLO
- COTC
- ENDO
- HDL
- KIDN
- LIVR
- LUNG
- LIPC
- MALM
- MEAC
- MENI
- MEOC
- MESC
- MULM
- PENC
- PERI
- PNEU
- PROS
- PYEL
- OSTI
- RECT
- STOM
- TESE
- UTER

---

Date of diagnosis:

\_\_\_\_\_  
((DD-MM-YYYY))

---

Diagnose:

- ALL
- AML
- ANUS
- BACT
- BLAD
- BRCA
- CERV
- CLL
- CML
- COLO
- COTC
- ENDO
- HDL
- KIDN
- LIVR
- LUNG
- LIPC
- MALM
- MEAC
- MENI
- MEOC
- MESC
- MULM
- PENC
- PERI
- PNEU
- PROS
- PYEL
- OSTI
- RECT
- STOM
- TESE
- UTER

---

Date of diagnosis:

\_\_\_\_\_  
((DD-MM-YYYY))

---

Diagnose:

- ALL
- AML
- ANUS
- BACT
- BLAD
- BRCA
- CERV
- CLL
- CML
- COLO
- COTC
- ENDO
- HDL
- KIDN
- LIVR
- LUNG
- LIPC
- MALM
- MEAC
- MENI
- MEOC
- MESC
- MULM
- PENC
- PERI
- PNEU
- PROS
- PYEL
- OSTI
- RECT
- STOM
- TESE
- UTER

---

Date of diagnosis:

\_\_\_\_\_  
((DD-MM-YYYY))

Diagnose:

- ALL
- AML
- ANUS
- BACT
- BLAD
- BRCA
- CERV
- CLL
- CML
- COLO
- COTC
- ENDO
- HDL
- KIDN
- LIVR
- LUNG
- LIPC
- MALM
- MEAC
- MENI
- MEOC
- MESC
- MULM
- PENC
- PERI
- PNEU
- PROS
- PYEL
- OSTI
- RECT
- STOM
- TESE
- UTER

Date of diagnosis:

\_\_\_\_\_  
((DD-MM-YYYY))

**Completed by and date**

Completed by:

\_\_\_\_\_  
((investigator's initials))

Date completed:

\_\_\_\_\_  
((DD-MM-YYYY))
